# Supplementary material for: Influence of Heat Treatment on Tea Polyphenols and Their Impact on Improving Heat Tolerance in Drosophila melanogaster
Source: MDPI journal article supplement (doi:10.3390/foods12203874), 2023-10-23
Supplement: s1 [file s1]

**Supplementary Table S1** Mass Spectrometry Detection Parameters

|                            | <b>positive mode</b>                                                                                 | <b>negative mode</b> |
|----------------------------|------------------------------------------------------------------------------------------------------|----------------------|
| Heater temperature         | 300 °C                                                                                               | 300 °C               |
| sheath gas flow rate       | 45 arb                                                                                               | 45 arb               |
| Auxiliary gas flow rate    | 15 arb                                                                                               | 15 arb               |
| exhaust gas flow rate      | 1 arb                                                                                                | 1 arb                |
| Electrospray voltage       | 3.0 KV                                                                                               | 3.2 KV               |
| capillary tube temperature | 350 °C                                                                                               | 350 °C               |
| S-Lens RF Level            | 30%                                                                                                  | 60%                  |
| scanning mode              | Full Scan (m/z 70~1050) with data-dependent Secondary<br>Mass Spectrometry Scan (dd-MS2 , TopN = 10) |                      |
| resolution (of a photo)    | 70000 (primary mass spectrometry (physics)) and 17500<br>(Secondary Mass Spectrometry                |                      |
| crash mode                 | High-energy collisional dissociation (HCD)                                                           |                      |

**Supplementary Table S2** Chromatographic conditions

|   | <b>proceedings</b>                                                                                                          | <b>explicit condition</b>                                                        |
|---|-----------------------------------------------------------------------------------------------------------------------------|----------------------------------------------------------------------------------|
| 1 | Sample injection volume 2 $\mu$ L, maintain column temperature 25°C at a flow rate of                                       | 0.5 mL/min.                                                                      |
|   | Chromatographic mobile phase composition A (A)                                                                              | water + 25 mmol/L ammonium acetate + 25 mmol/L ammonia                           |
| 2 | Chromatographic mobile phase composition B (B)                                                                              | acetonitrile                                                                     |
|   |                                                                                                                             | ① 95% chromatographic mobile phase B, elution time 0-0.5 min                     |
|   |                                                                                                                             | ② B varied linearly from 95 to 65 % with elution times ranging from 0.5 to 7 min |
|   |                                                                                                                             | ③ B varied linearly from 65 to 40 % with an elution time of 7-8 min              |
| 3 | Gradient elution procedure for chromatographic separations                                                                  | ④ The B concentration was maintained at 40 % and the elution time was 8-9 min    |
|   |                                                                                                                             | ⑤ B varied linearly from 40% to 95% with elution times of 9 to 9.1 min           |
|   |                                                                                                                             | ⑥ The B concentration was maintained at 95 % and the elution time was 9.1-12 min |
| 4 | The sample is placed in a 4°C autosampler throughout the analysis and the samples are analysed continuously in random order |                                                                                  |

**Supplementary Table S3** ESI Source Conditions

| <b>proceedings</b>                               | <b>prerequisite</b>                                                                 |
|--------------------------------------------------|-------------------------------------------------------------------------------------|
| Ion Source Gas1(Gas1)                            | 60                                                                                  |
| Ion Source Gas2(Gas2)                            | 60                                                                                  |
| Curtain gas (CUR)                                | 30                                                                                  |
| source temperature                               | 600°C                                                                               |
| IonSapary Voltage Floating (ISVF)                | ± 5500 V(Positive and negative modes)                                               |
| TOF MS scan m/z range and accumulation time      | 60-1000 Da, 0.20 s/spectra,                                                         |
| product ion scan m/z range and accumulation time | 25-1000 Da, 0.05 s/spectra                                                          |
| Secondary Mass Spectrometry                      | information dependent acquisition (IDA),<br>high sensitivity paradigm               |
| Declustering potential (DP):                     | ± 60 V(Positive and negative modes)                                                 |
| Collision Energy                                 | 35 ±15 eV, Exclude isotopes within 4 Da;<br>Candidate ions to monitor per cycle: 10 |

**Supplementary Table S4** GO enrichment analysis of differentially expressed genes in *Drosophila* before and after high temperature stress (partial results)

| Control vs<br>Treat | GO.ID      | Domain | Term                                                | Up | Down | DEG | Annotated | P value  |
|---------------------|------------|--------|-----------------------------------------------------|----|------|-----|-----------|----------|
| C vs C <sub>H</sub> | GO:0031224 | CC     | intrinsic component of membrane                     | 85 | 223  | 308 | 3205      | 3.04E-16 |
|                     | GO:0016021 | CC     | integral component of membrane                      | 85 | 221  | 306 | 3179      | 3.26E-16 |
|                     | GO:0005576 | CC     | extracellular region                                | 48 | 109  | 157 | 1307      | 2.38E-15 |
|                     | GO:0050830 | BP     | defense response to Gram-positive bacterium         | 2  | 20   | 22  | 56        | 2.53E-12 |
|                     | GO:0005615 | CC     | extracellular space                                 | 29 | 69   | 98  | 749       | 8.01E-12 |
|                     | GO:0044425 | CC     | membrane part                                       | 93 | 234  | 327 | 3716      | 8.23E-12 |
|                     | GO:0044421 | CC     | extracellular region part                           | 39 | 76   | 115 | 966       | 4.99E-11 |
|                     | GO:0070011 | MF     | peptidase activity, acting on L-amino acid peptides | 14 | 65   | 79  | 588       | 6.11E-09 |
|                     | GO:0008233 | MF     | peptidase activity                                  | 14 | 66   | 80  | 602       | 8.05E-09 |
|                     | GO:0008236 | MF     | serine-type peptidase activity                      | 8  | 41   | 49  | 304       | 1.98E-08 |
|                     | GO:0017171 | MF     | serine hydrolase activity                           | 8  | 41   | 49  | 305       | 2.21E-08 |
|                     | GO:0016020 | CC     | membrane                                            | 97 | 245  | 342 | 4201      | 4.97E-08 |
|                     | GO:0004252 | MF     | serine-type endopeptidase activity                  | 8  | 37   | 45  | 279       | 7.44E-08 |
|                     | GO:0004175 | MF     | endopeptidase activity                              | 11 | 48   | 59  | 439       | 5.58E-07 |
|                     | GO:0072330 | BP     | monocarboxylic acid biosynthetic process            | 7  | 16   | 23  | 109       | 6.33E-07 |
|                     | GO:0005887 | CC     | integral component of plasma membrane               | 17 | 42   | 59  | 483       | 1.60E-06 |
|                     | GO:0019731 | BP     | antibacterial humoral response                      | 2  | 14   | 16  | 63        | 2.52E-06 |
|                     | GO:0016798 | MF     | hydrolase activity, acting on glycosyl bonds        | 6  | 18   | 24  | 122       | 2.61E-06 |
|                     | GO:0044283 | BP     | small molecule biosynthetic process                 | 10 | 31   | 41  | 288       | 3.12E-06 |
|                     | GO:0046394 | BP     | carboxylic acid biosynthetic process                | 8  | 20   | 28  | 163       | 3.23E-06 |

Supplementary Table S4 (continued)

| Control vs<br>Treat | GO.ID      | Domain | Term                                                          | Up  | Down | DEG | Annotated | P value  |
|---------------------|------------|--------|---------------------------------------------------------------|-----|------|-----|-----------|----------|
| TP vs TP_H          | GO:0005615 | CC     | extracellular space                                           | 59  | 108  | 167 | 749       | 5.26E-29 |
|                     | GO:0005576 | CC     | extracellular region                                          | 110 | 128  | 238 | 1307      | 1.89E-27 |
|                     | GO:0044421 | CC     | extracellular region part                                     | 67  | 116  | 183 | 966       | 8.24E-23 |
|                     | GO:0045434 | BP     | negative regulation of<br>female receptivity, post-<br>mating | 2   | 9    | 11  | 15        | 4.61E-09 |
|                     | GO:0008238 | MF     | exopeptidase activity                                         | 18  | 13   | 31  | 107       | 7.73E-09 |
|                     | GO:0046008 | BP     | regulation of female<br>receptivity, post-mating              | 2   | 11   | 13  | 22        | 9.24E-09 |
|                     | GO:0008237 | MF     | metallopeptidase activity                                     | 23  | 15   | 38  | 152       | 1.51E-08 |
|                     | GO:0007621 | BP     | negative regulation of<br>female receptivity                  | 2   | 9    | 11  | 17        | 3.50E-08 |
|                     | GO:0008235 | MF     | metalloexopeptidase<br>activity                               | 11  | 10   | 21  | 61        | 7.70E-08 |
|                     | GO:0070011 | MF     | peptidase activity, acting<br>on L-amino acid peptides        | 61  | 33   | 94  | 588       | 1.79E-07 |
|                     | GO:0008233 | MF     | peptidase activity                                            | 61  | 33   | 94  | 602       | 5.39E-07 |
|                     | GO:0045924 | BP     | regulation of female<br>receptivity                           | 3   | 11   | 14  | 34        | 8.88E-07 |
|                     | GO:0004177 | MF     | aminopeptidase activity                                       | 9   | 10   | 19  | 59        | 1.04E-06 |
|                     | GO:0007618 | BP     | mating                                                        | 19  | 19   | 38  | 180       | 1.40E-06 |
|                     | GO:0030312 | CC     | external encapsulating<br>structure                           | 14  | 2    | 16  | 46        | 1.71E-06 |
|                     | GO:0007320 | BP     | insemination                                                  | 0   | 12   | 12  | 28        | 3.27E-06 |
|                     | GO:0055085 | BP     | transmembrane transport                                       | 76  | 44   | 120 | 857       | 3.57E-06 |
|                     | GO:0042026 | BP     | protein refolding                                             | 0   | 13   | 13  | 33        | 3.97E-06 |
|                     | GO:0044706 | BP     | multi-multicellular<br>organism process                       | 0   | 12   | 12  | 29        | 5.10E-06 |
|                     | GO:0007620 | BP     | copulation                                                    | 1   | 12   | 13  | 34        | 5.88E-06 |
| TP6 vs<br>TP6_H     | GO:0005615 | CC     | extracellular space                                           | 19  | 170  | 189 | 749       | 4.43E-23 |
|                     | GO:0030312 | CC     | external encapsulating<br>structure                           | 32  | 0    | 32  | 46        | 3.76E-19 |
|                     | GO:0044421 | CC     | extracellular region part                                     | 22  | 186  | 208 | 966       | 1.22E-16 |
|                     | GO:0042600 | CC     | chorion                                                       | 28  | 0    | 28  | 41        | 1.39E-16 |
|                     | GO:0005576 | CC     | extracellular region                                          | 37  | 221  | 258 | 1307      | 1.52E-15 |
|                     | GO:0097014 | CC     | ciliary plasm                                                 | 0   | 28   | 28  | 57        | 1.58E-11 |
|                     | GO:0007320 | BP     | insemination                                                  | 0   | 19   | 19  | 28        | 1.70E-11 |
|                     | GO:0044706 | BP     | multi-multicellular<br>organism process                       | 0   | 19   | 19  | 29        | 4.35E-11 |

Supplementary Table S4 (continued)

| Control vs<br>Treat | GO.ID      | Domain | Term                                                          | Up | Down | DEG | Annotated | P<br>value |
|---------------------|------------|--------|---------------------------------------------------------------|----|------|-----|-----------|------------|
|                     | GO:0005929 | CC     | cilium                                                        | 1  | 51   | 52  | 163       | 5.31E-11   |
|                     | GO:0005930 | CC     | axoneme                                                       | 0  | 27   | 27  | 56        | 6.32E-11   |
|                     | GO:0046692 | BP     | sperm competition                                             | 0  | 18   | 18  | 27        | 9.26E-11   |
|                     | GO:0007620 | BP     | copulation                                                    | 1  | 19   | 20  | 34        | 2.27E-10   |
|                     | GO:0044441 | CC     | ciliary part                                                  | 0  | 37   | 37  | 109       | 4.80E-09   |
|                     | GO:0046008 | BP     | regulation of female<br>receptivity, post-mating              | 1  | 13   | 14  | 22        | 2.96E-08   |
|                     | GO:0003341 | BP     | cilium movement                                               | 0  | 19   | 19  | 39        | 4.25E-08   |
|                     | GO:0042026 | BP     | protein refolding                                             | 0  | 17   | 17  | 33        | 7.70E-08   |
|                     | GO:0045434 | BP     | negative regulation of<br>female receptivity, post-<br>mating | 1  | 10   | 11  | 15        | 1.06E-07   |
|                     | GO:0048029 | MF     | monosaccharide binding                                        | 4  | 18   | 22  | 54        | 2.24E-07   |
|                     | GO:0044782 | BP     | cilium organization                                           | 0  | 40   | 40  | 141       | 4.29E-07   |
|                     | GO:0004656 | MF     | procollagen-proline 4-<br>dioxxygenase activity               | 2  | 12   | 14  | 26        | 5.85E-07   |

Note: Control vs Treat: Control group vs experimental group; Domain: BP、MF、CC represent biological processes, molecular functions and cellular components, respectively; GO ID: ID of GO term; Term: GO Function; Annotated: Number of all genes annotated to this function; DEG: Differently expressed genes; P value: Enrichment Significance P-value; Up、Down: denote the number of genes up- and down-regulated in Treat compared to Control group, respectively. Same as below.

**Supplementary Table S5** GO enrichment analysis of differentially expressed genes in *Drosophila* with different tea polyphenol dietary interventions (partial results)

| Control vs<br>Treat | GO.ID      | Domain | Term                                                          | Up  | Down | DEG | Annotated | P value  |
|---------------------|------------|--------|---------------------------------------------------------------|-----|------|-----|-----------|----------|
| C vs TP             | GO:0005615 | CC     | extracellular space                                           | 122 | 62   | 184 | 749       | 5.84E-40 |
|                     | GO:0005576 | CC     | extracellular region                                          | 147 | 108  | 255 | 1307      | 4.31E-37 |
|                     | GO:0044421 | CC     | extracellular region part                                     | 131 | 71   | 202 | 966       | 3.91E-33 |
|                     | GO:0050830 | BP     | defense response to Gram-<br>positive bacterium               | 3   | 20   | 23  | 56        | 1.61E-10 |
|                     | GO:0045434 | BP     | negative regulation of<br>female receptivity, post-<br>mating | 9   | 2    | 11  | 15        | 3.36E-09 |
|                     | GO:0046008 | BP     | regulation of female<br>receptivity, post-mating              | 11  | 2    | 13  | 22        | 6.43E-09 |
|                     | GO:0007621 | BP     | negative regulation of<br>female receptivity                  | 9   | 2    | 11  | 17        | 2.56E-08 |
|                     | GO:0007320 | BP     | insemination                                                  | 13  | 0    | 13  | 28        | 2.87E-07 |
|                     | GO:0019731 | BP     | antibacterial humoral<br>response                             | 5   | 15   | 20  | 63        | 3.98E-07 |
|                     | GO:0044706 | BP     | multi-multicellular<br>organism process                       | 13  | 0    | 13  | 29        | 4.77E-07 |
|                     | GO:0055114 | BP     | oxidation-reduction<br>process                                | 60  | 50   | 110 | 764       | 6.04E-07 |
|                     | GO:0016491 | MF     | oxidoreductase activity                                       | 52  | 50   | 102 | 679       | 6.18E-07 |
|                     | GO:0007620 | BP     | copulation                                                    | 13  | 1    | 14  | 34        | 6.18E-07 |
|                     | GO:0045924 | BP     | regulation of female<br>receptivity                           | 11  | 3    | 14  | 34        | 6.18E-07 |
|                     | GO:0017144 | BP     | drug metabolic process                                        | 49  | 23   | 72  | 443       | 7.68E-07 |
|                     | GO:0008238 | MF     | exopeptidase activity                                         | 14  | 13   | 27  | 107       | 1.17E-06 |
|                     | GO:0005975 | BP     | carbohydrate metabolic<br>process                             | 32  | 18   | 50  | 273       | 1.23E-06 |
|                     | GO:0046692 | BP     | sperm competition                                             | 12  | 0    | 12  | 27        | 1.49E-06 |
|                     | GO:0008235 | MF     | metalloexopeptidase<br>activity                               | 10  | 9    | 19  | 61        | 1.51E-06 |
|                     | GO:0030246 | MF     | carbohydrate binding                                          | 21  | 11   | 32  | 142       | 1.86E-06 |
| C vs TP6            | GO:0005615 | CC     | extracellular space                                           | 158 | 36   | 194 | 749       | 2.90E-30 |
|                     | GO:0030312 | CC     | external encapsulating<br>structure                           | 0   | 38   | 38  | 46        | 1.06E-28 |
|                     | GO:0042600 | CC     | chorion                                                       | 0   | 34   | 34  | 41        | 6.58E-26 |
|                     | GO:0044421 | CC     | extracellular region part                                     | 168 | 45   | 213 | 966       | 4.03E-23 |
|                     | GO:0005576 | CC     | extracellular region                                          | 196 | 68   | 264 | 1307      | 8.31E-23 |
|                     | GO:0007320 | BP     | insemination                                                  | 20  | 0    | 20  | 28        | 2.32E-13 |
|                     | GO:0044706 | BP     | multi-multicellular<br>organism process                       | 20  | 0    | 20  | 29        | 6.66E-13 |
|                     | GO:0046692 | BP     | sperm competition                                             | 19  | 0    | 19  | 27        | 1.44E-12 |
|                     | GO:0007620 | BP     | copulation                                                    | 20  | 1    | 21  | 34        | 4.46E-12 |
|                     | GO:0097014 | CC     | ciliary plasm                                                 | 27  | 0    | 27  | 57        | 1.34E-11 |
|                     | GO:0005930 | CC     | axoneme                                                       | 26  | 0    | 26  | 56        | 5.65E-11 |

Supplementary Table S5 (continued)

| Control vs<br>Treat | GO.ID      | Domain | Term                                                         | Up  | Down | DEG | Annotated | P value      |
|---------------------|------------|--------|--------------------------------------------------------------|-----|------|-----|-----------|--------------|
| TP vs TP6           | GO:0046008 | BP     | regulation of female<br>receptivity, post-<br>mating         | 14  | 1    | 15  | 22        | 7.11E-<br>10 |
|                     | GO:0005929 | CC     | cilium                                                       | 46  | 1    | 47  | 163       | 9.75E-<br>10 |
|                     | GO:0044441 | CC     | ciliary part                                                 | 36  | 0    | 36  | 109       | 1.62E-<br>09 |
|                     | GO:0032504 | BP     | multicellular organism<br>reproduction                       | 185 | 40   | 225 | 1378      | 2.14E-<br>08 |
|                     | GO:0045434 | BP     | negative regulation of<br>female receptivity,<br>post-mating | 10  | 1    | 11  | 15        | 4.53E-<br>08 |
|                     | GO:0003341 | BP     | cilium movement                                              | 18  | 0    | 18  | 39        | 7.90E-<br>08 |
|                     | GO:0007621 | BP     | negative regulation of<br>female receptivity                 | 10  | 1    | 11  | 17        | 3.29E-<br>07 |
|                     | GO:0044447 | CC     | axoneme part                                                 | 14  | 0    | 14  | 29        | 8.97E-<br>07 |
|                     | GO:0001539 | BP     | cilium or flagellum-<br>dependent cell motility              | 13  | 0    | 13  | 25        | 9.31E-<br>07 |
|                     | GO:0042600 | CC     | chorion                                                      | 0   | 21   | 21  | 41        | 2.21E-<br>19 |
|                     | GO:0030312 | CC     | external encapsulating<br>structure                          | 0   | 21   | 21  | 46        | 4.76E-<br>18 |
|                     | GO:0005615 | CC     | extracellular space                                          | 60  | 5    | 65  | 749       | 7.13E-<br>10 |
|                     | GO:0032504 | BP     | multicellular organism<br>reproduction                       | 80  | 15   | 95  | 1378      | 3.68E-<br>08 |
|                     | GO:0007320 | BP     | insemination                                                 | 10  | 0    | 10  | 28        | 6.26E-<br>08 |
|                     | GO:0044706 | BP     | multi-multicellular<br>organism process                      | 10  | 0    | 10  | 29        | 9.22E-<br>08 |
|                     | GO:0044421 | CC     | extracellular region<br>part                                 | 62  | 8    | 70  | 966       | 2.53E-<br>07 |
|                     | GO:0005929 | CC     | cilium                                                       | 22  | 0    | 22  | 163       | 3.58E-<br>07 |
|                     | GO:0031514 | CC     | motile cilium                                                | 10  | 0    | 10  | 34        | 4.22E-<br>07 |
|                     | GO:0007620 | BP     | copulation                                                   | 10  | 0    | 10  | 34        | 5.05E-<br>07 |



---

|            |    |                            |    |    |    |      |          |
|------------|----|----------------------------|----|----|----|------|----------|
| GO:0046692 | BP | sperm competition          | 9  | 0  | 9  | 27   | 5.76E-07 |
| GO:0005576 | CC | extracellular region       | 72 | 14 | 86 | 1307 | 6.14E-07 |
| GO:0000003 | BP | reproduction               | 82 | 15 | 97 | 1515 | 8.83E-07 |
| GO:0030317 | BP | flagellated sperm motility | 10 | 0  | 10 | 38   | 1.58E-06 |
| GO:0097722 | BP | sperm motility             | 10 | 0  | 10 | 38   | 1.58E-06 |
| GO:0007286 | BP | spermatid development      | 17 | 0  | 17 | 115  | 2.82E-06 |
| GO:0048515 | BP | spermatid differentiation  | 18 | 0  | 18 | 128  | 3.01E-06 |
| GO:0036126 | CC | sperm flagellum            | 6  | 0  | 6  | 13   | 4.66E-06 |
| GO:0097729 | CC | 9+2 motile cilium          | 6  | 0  | 6  | 13   | 4.66E-06 |
| GO:0097223 | CC | sperm part                 | 6  | 0  | 6  | 16   | 1.97E-05 |

---

**Supplementary Table S6** List of overlapping differential metabolic markers in three groups (C vs C\_H, TP vs TP\_H, TP6 vs TP6\_H) before and after high temperature stress in *Drosophila* (partial results)

| NO | ID         | Name                              | Description                                                                                                                               | Regulated |
|----|------------|-----------------------------------|-------------------------------------------------------------------------------------------------------------------------------------------|-----------|
| 1  | M203T195   | 3,5-Dihydroxydecanoic acid        | Carbonyl compounds, production and removal in organisms is a dynamic equilibrium                                                          | up        |
| 2  | M215T304_3 | Undecanedioic acid                | medium chain fatty acid                                                                                                                   | up        |
| 3  | M187T332   | Azelaic acid                      | Dicarboxylic acid with antibacterial and antioxidant activity                                                                             | up        |
| 4  | M217T345   | Hydroxysebacic acid               | Dicarboxylic acid, metabolised by amino acids and sugars                                                                                  | up        |
| 5  | M87T249    | Isobutyric acid                   | Isobutyric acid, a major metabolite of amino acids                                                                                        | up        |
| 6  | M131T249   | Ethylmalonic acid                 | Metabolite, functionally related to malonic acid                                                                                          | up        |
| 7  | M173T496   | Arginine                          | Arginine metabolism, an important amino acid metabolism that maintains normal cellular functions                                          | up        |
| 8  | M164T246_2 | Phenylalanine                     | Phenylalanine, which plays a key role in the biosynthetic metabolism of other amino acids                                                 | up        |
| 9  | M201T320   | Sebacic acid                      | Promote, stabilise metabolism                                                                                                             | up        |
| 10 | M271T219_2 | Borrelidin                        | Promote, stabilise metabolism                                                                                                             | up        |
| 11 | M197T51_2  | 12-hydroxydodecanoic acid         | Active endogenous metabolites                                                                                                             | up        |
| 12 | M187T105   | 3-hydroxycapric acid              | 3-Hydroxydecanoic acid is a medium chain fatty acid                                                                                       | up        |
| 13 | M171T53    | Capric acid                       | Promote, stabilise metabolism                                                                                                             | up        |
| 14 | M159T131   | 3-hydroxyoctanoic acid            | Oxidative metabolites of medium-chain fatty acids                                                                                         | up        |
| 15 | M215T92    | 3-hydroxydodecanoic acid          | Medium-chain fatty acids, related to fatty acid metabolism                                                                                | up        |
| 16 | M214T381   | sn-Glycerol 3-phosphoethanolamine | Organic compounds, very strong alkaline chemistry                                                                                         | up        |
| 17 | M258T405   | Ile-Lys                           | dipeptide                                                                                                                                 | up        |
| 18 | M135T254   | Threonic acid                     | Threonine, which plays a role in the body in balancing amino acids and regulating fat metabolism                                          | up        |
| 19 | M206T171   | N-acetyl-l-phenylalanine          | N-acetyl-L-phenylalanine is the product of phenylalanine N-acetyltransferase, an enzyme present in the metabolic pathway of phenylalanine | up        |
| 20 | M428T63    | N-oleoyl-phenylalanine            | N-oleoyl phenylalanine with multiple signalling functions                                                                                 | up        |

Note: ID: metabolite ID; Name: metabolite name; Description: description of the metabolite (both from the Human Metabolome Database and the National Library of Medicine).

**Supplementary Table S7 List of metabolic markers specific to C vs TP and TP6 vs TP, respectively (partial results)**

| Group     | ID         | Name                                            | Description                                                                                                                       | Regulated |
|-----------|------------|-------------------------------------------------|-----------------------------------------------------------------------------------------------------------------------------------|-----------|
| C vs TP   | M211T58    | Prohexadione                                    | Acts as a plant growth regulator and inhibitor of gibberellin biosynthesis                                                        | up        |
|           | M177T375   | L-Gulonic gamma-lactone                         | econdary metabolites, metabolic or physiologically non-essential metabolites that may act as defence or signalling molecules      | up        |
|           | M167T446   | Phosphoenolpyruvate                             | A metabolic intermediate in pathways such as glycolysis and gluconeogenesis, with a role as a basic metabolite                    | up        |
|           | M341T354   | Sucrose                                         | Plays a key role in the body's stress response                                                                                    | up        |
|           | M401T354   | Galactinol                                      | Involved in the scavenging of reactive oxygen species and promoted the production of HSP27                                        | up        |
|           | M563T416   | Raffinose                                       | Playing an important role in plant resistance                                                                                     | up        |
|           | M683T378   | Cellobiose                                      | Endogenous metabolites                                                                                                            | up        |
|           | M133T392_2 | Malate                                          | Important organic acids produced during the metabolism of organisms                                                               | up        |
|           | M563T439   | Maltotriose                                     | A xylose metabolite                                                                                                               | up        |
| TP6 vs TP | M665T480   | Maltotetraose                                   | Able to break down and metabolise with high efficiency                                                                            | up        |
|           | M165T112   | 1-methylxanthine                                | Primary metabolites, directly involved in the growth, development or reproduction of organisms                                    | up        |
|           | M137T173   | Salicylic acid                                  | Activation of the plant salicylic acid signalling pathway for insect survival and reproduction                                    | up        |
|           | M266T427   | N-acetyl-d-glucosamine (N-Acetyl-D-glucosamine) | Bacterial metabolites                                                                                                             | up        |
|           | M285T198   | Hexadecanedioic acid (Hexadecanedioic acid)     | Possesses anti-tumour activity                                                                                                    | up        |
|           | M310T230   | Leonurine ephedrine (Leonurus heterophyllus)    | Affects homocysteine-methionine metabolism, increases methionine levels                                                           | up        |
|           | M151T208_2 | Xanthine (thymine)                              | Purine metabolites                                                                                                                | up        |
|           | M547T431_2 | Cytidine 5'-diphosphocholine (CDP-choline)      | Stabilisation and repair of biofilms, neuroprotection                                                                             | up        |
|           | M243T233   | Pseudouridine                                   | Essential metabolites, a class of organic compounds called nucleosides and nucleotide analogues, end products of tRNA degradation | up        |
|           | M188T378   | N-acetyl-l-glutamate (N-Acetyl-L-glutamine)     | Acts as a brewer's yeast metabolite and a human metabolite                                                                        | up        |
|           | M118T339_2 | DL-threonine                                    | Metabolism to produce glycine                                                                                                     | up        |
